# Supplementary material for: Single-cell analyses identify monocyte gene expression profiles that influence HIV-1 reservoir size in acutely treated cohorts
Source: Springer Nature journal article supplement (doi:10.1038/s41467-025-59833-9), 2025-05-29
Supplement: MOESM1 [file 41467_2025_59833_MOESM1_ESM.pdf]

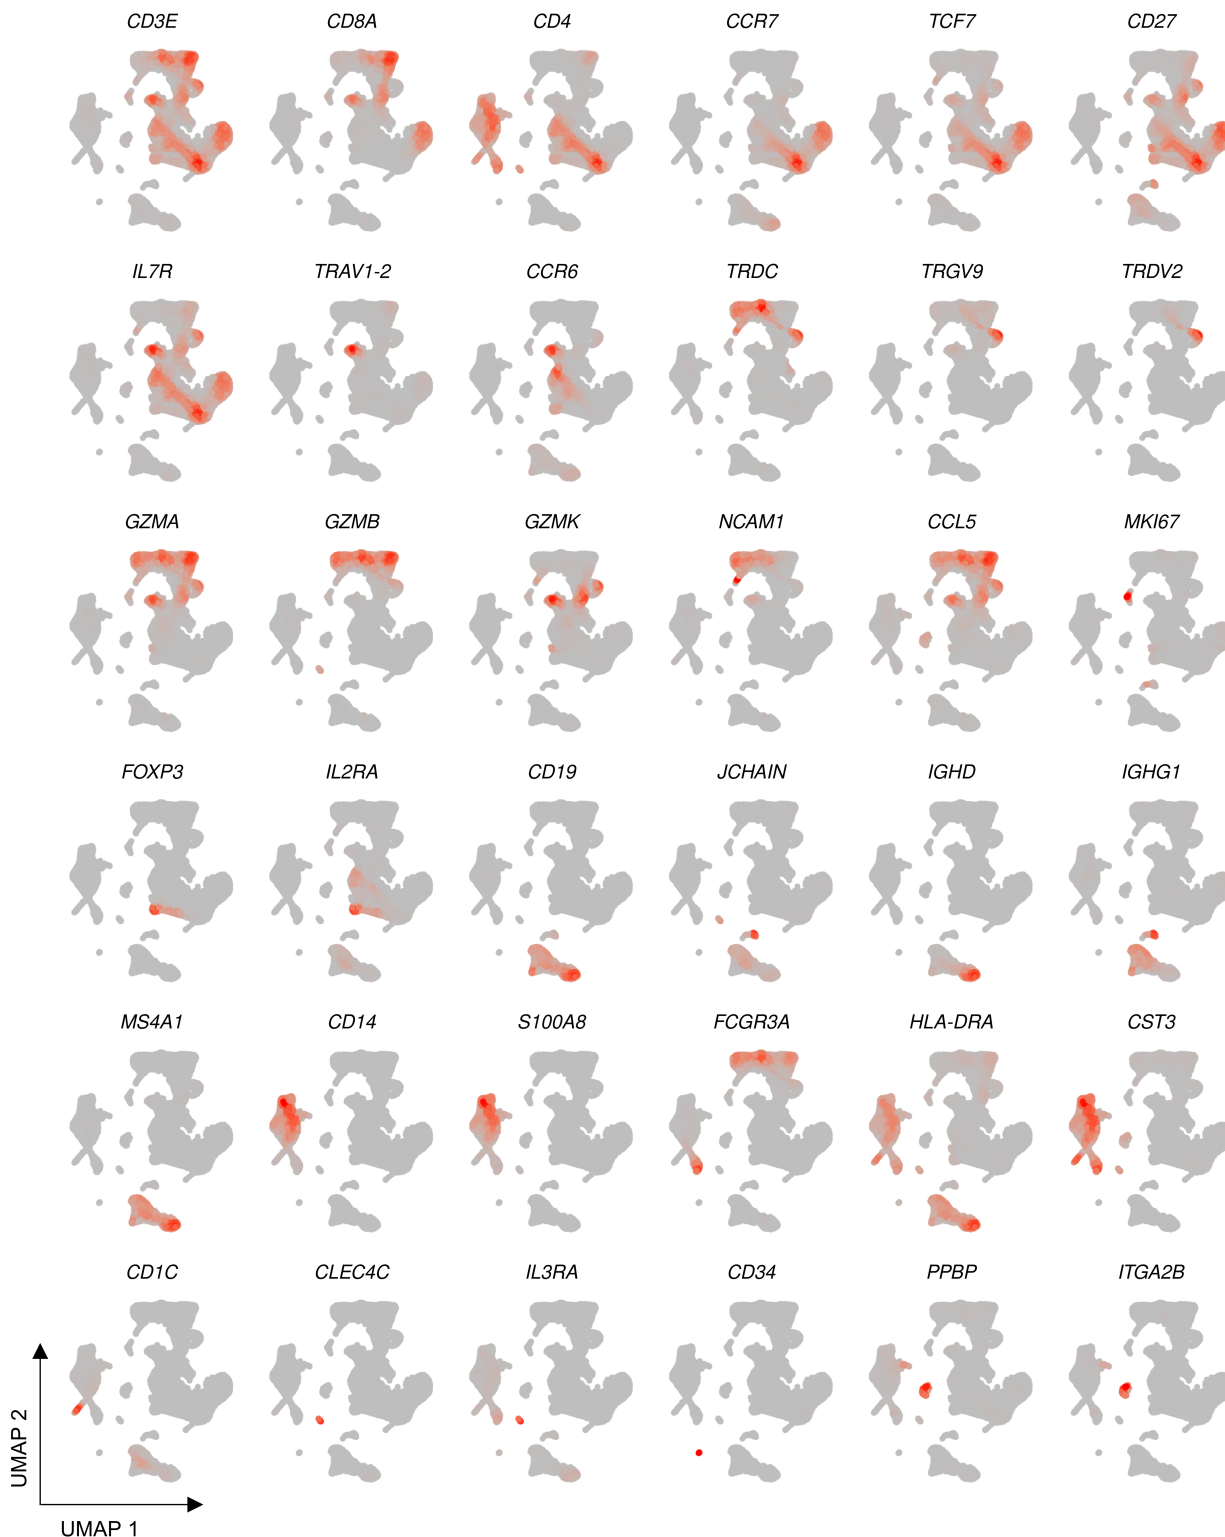

**Supplementary Figure 1. Expression of select lineage markers in specific cell subsets.** Expression of known lineage marker genes is localized to certain regions on the scRNA-seq UMAP and enables cell type assignment of clusters. Color indicates density of cells expressing the marker and is relative for each gene (gray: no expression and red: highest density of expression).

**a**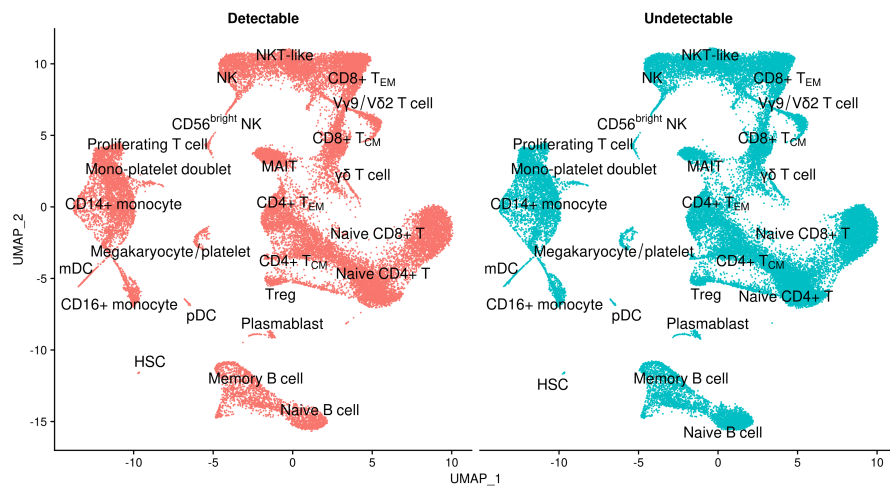**b**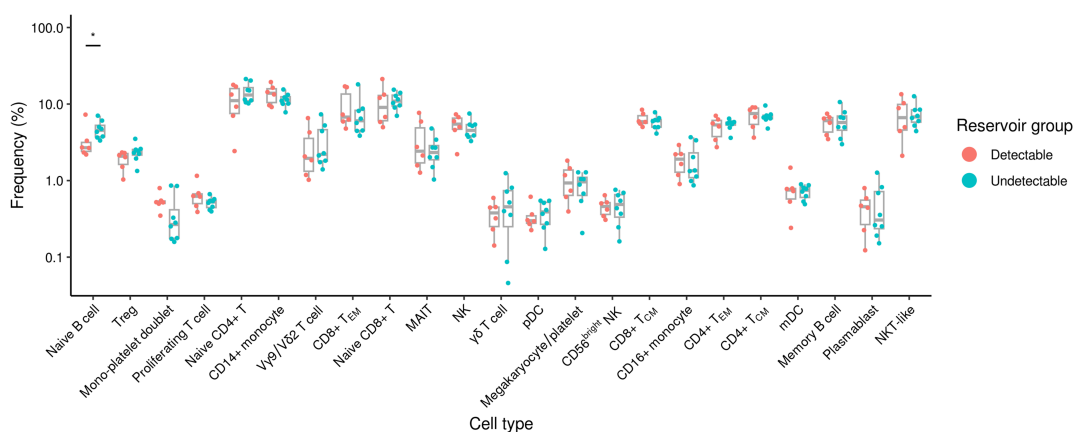

**Supplementary Figure 2. Clustering and frequency comparisons of scRNA-seq immune cell subsets.** scRNA-seq shows similar **a** spatial patterns of cell populations and **b** frequencies of cells between detectable (red) and undetectable (teal) reservoir groups. Significance was determined by the Mann-Whitney  $U$  two-sided test,  $n=14$  participants. \* nominal  $P < 0.05$



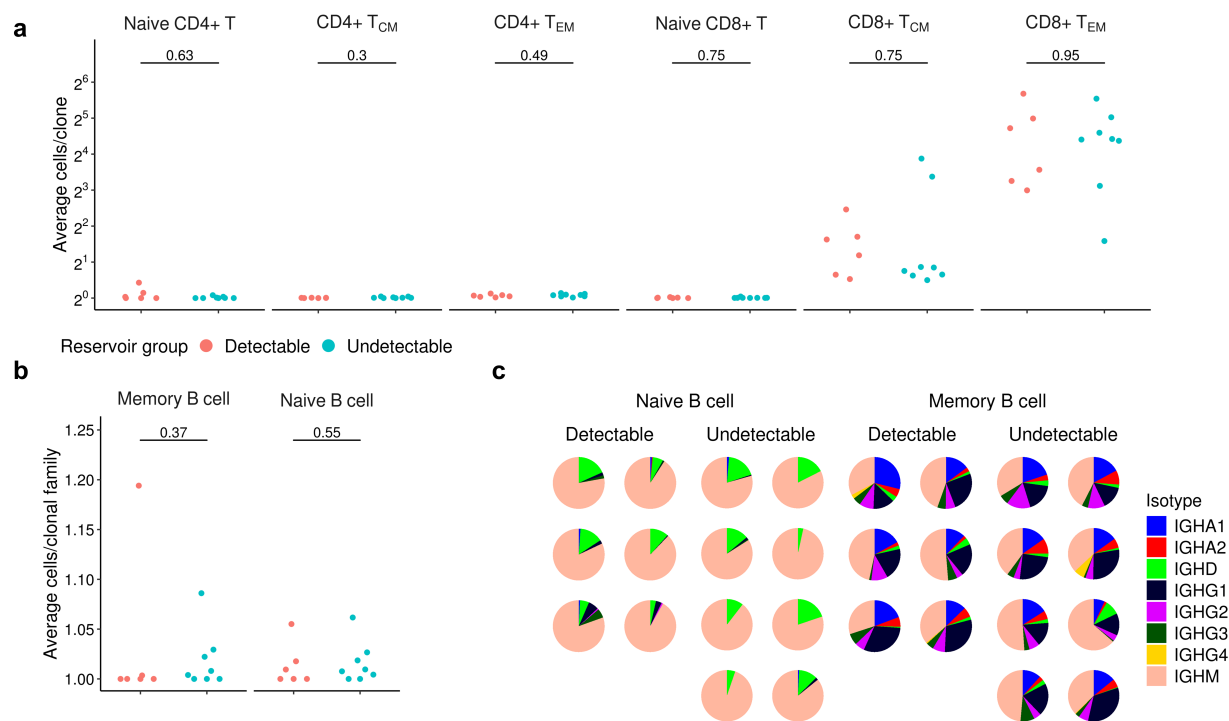

**Supplementary Figure 3. T cell receptor and B cell receptor clonal diversity and isotype distribution.** Clonal diversity of **a** indicated T cell populations and **b** memory and naive B cell populations. Significance was determined by the Mann-Whitney *U* two-sided test, *n*=14 participants. **c** BCR isotype distribution of each participant within naïve and memory B cells.

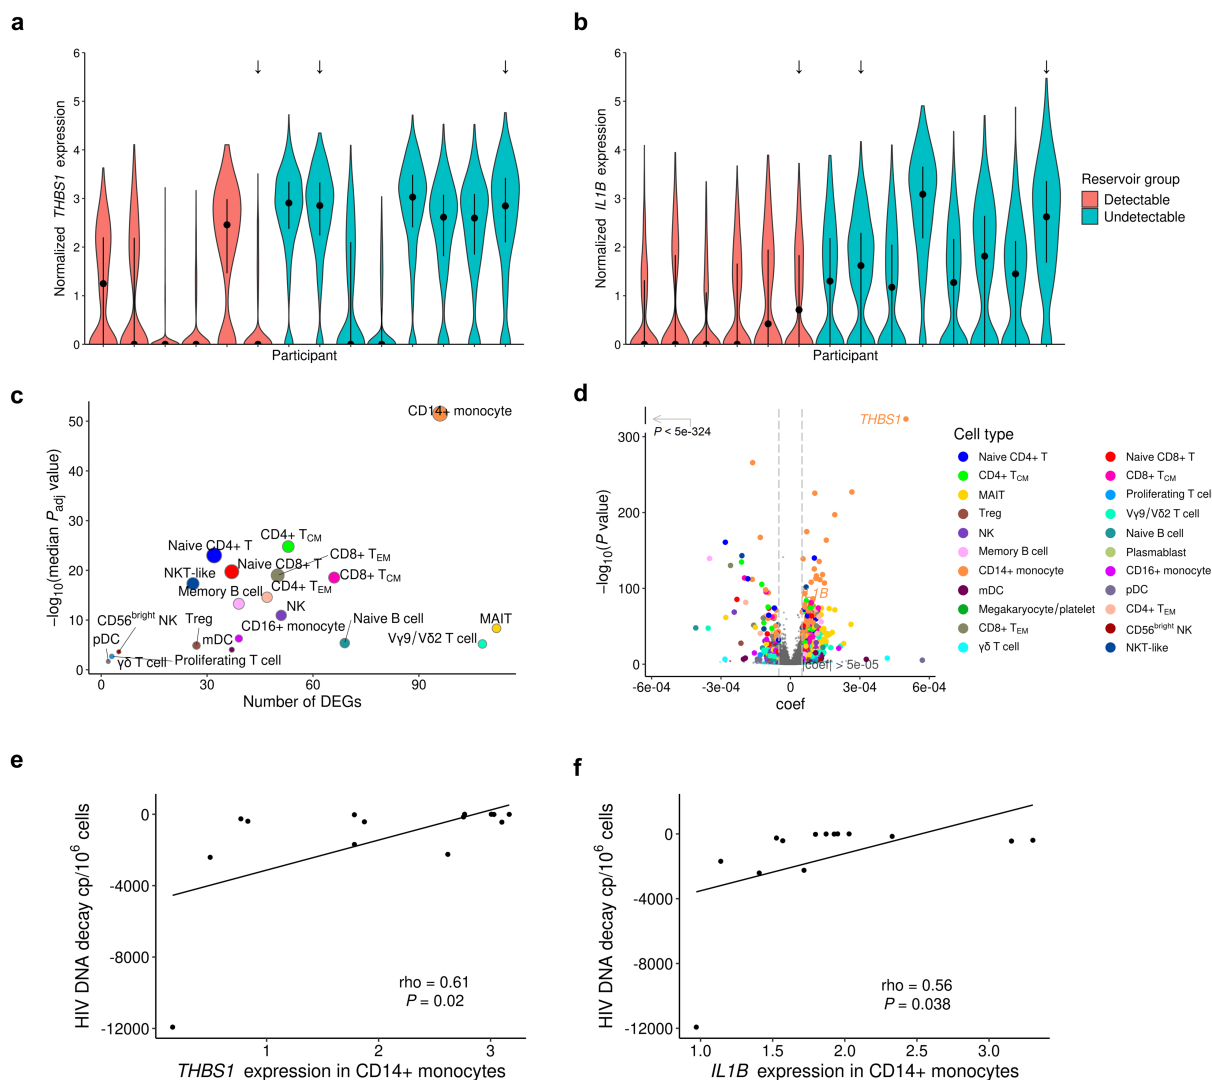

**Supplementary Figure 4. Gene expression in CD14+ monocytes across participants in RV254 and HIV DNA outcomes.** Gene expression in CD14+ monocytes of **a** *THBS1* and **b** *IL1B* genes across participants based on categorization of total HIV DNA measured from total PBMC or CD4+ T cells. Black circles represent the median values, and vertical lines indicate the interquartile range. Teal: undetectable reservoir; red: detectable reservoir. Three datapoints were missing due to technical differences and insufficient sample to perform the HIV DNA assay in sorted CD4+ T cells and these participants are indicated by vertical arrows. **c**, **d** Total HIV DNA decay associations when examining change in reservoir from week 0 (AHI) to 48 weeks after ART initiation with **c** number of significant DEG and **d** top genes associating with reservoir decay. Significance was determined using the MAST framework and *P* values shown are adjusted for Bonferroni correction per cell type for the number of expressed genes. DEG summarized in **c** were filtered as described in the Methods section. **e**, **f** Spearman correlation of total HIV DNA decay with **e** *THBS1* and **f** *IL1B* gene expression in CD14+ monocytes, *n*=14.

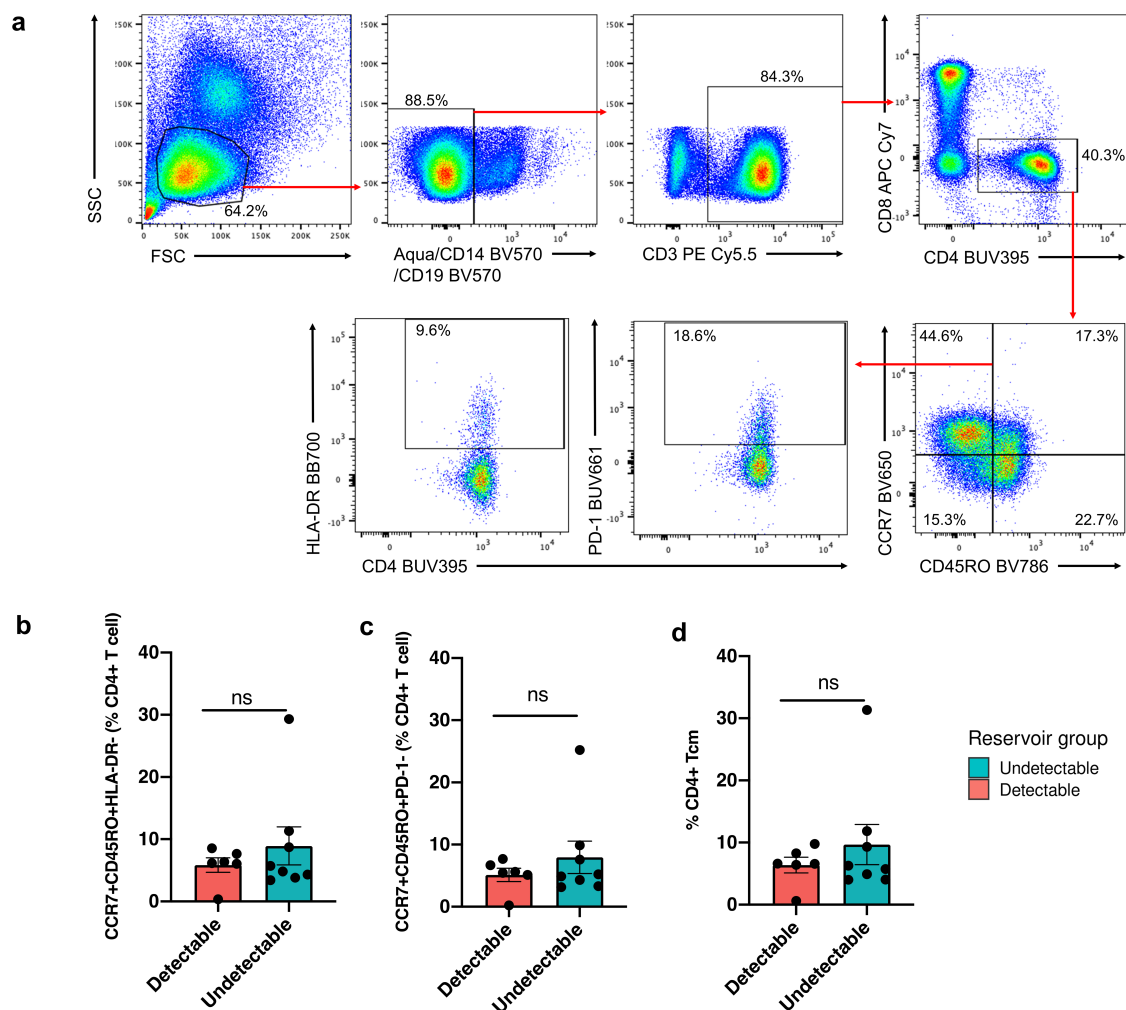

**Supplementary Figure 5. No differences in frequencies of CD4+ T<sub>CM</sub> cell subsets between reservoir groups. a** Gating strategy for the identification of CD4+ T<sub>CM</sub> cell subsets from the RV254 participants. **b** DR- CD4+ T<sub>CM</sub>, **c** PD-1- CD4+ T<sub>CM</sub> and **d** CD4+ T<sub>CM</sub>. Significance was determined by the Mann-Whitney *U* two-sided test, *n*=14. Teal: undetectable reservoir; red: detectable reservoir. Bar height and error bars represent mean values  $\pm$  SEM. Source data are provided in the Source Data file.

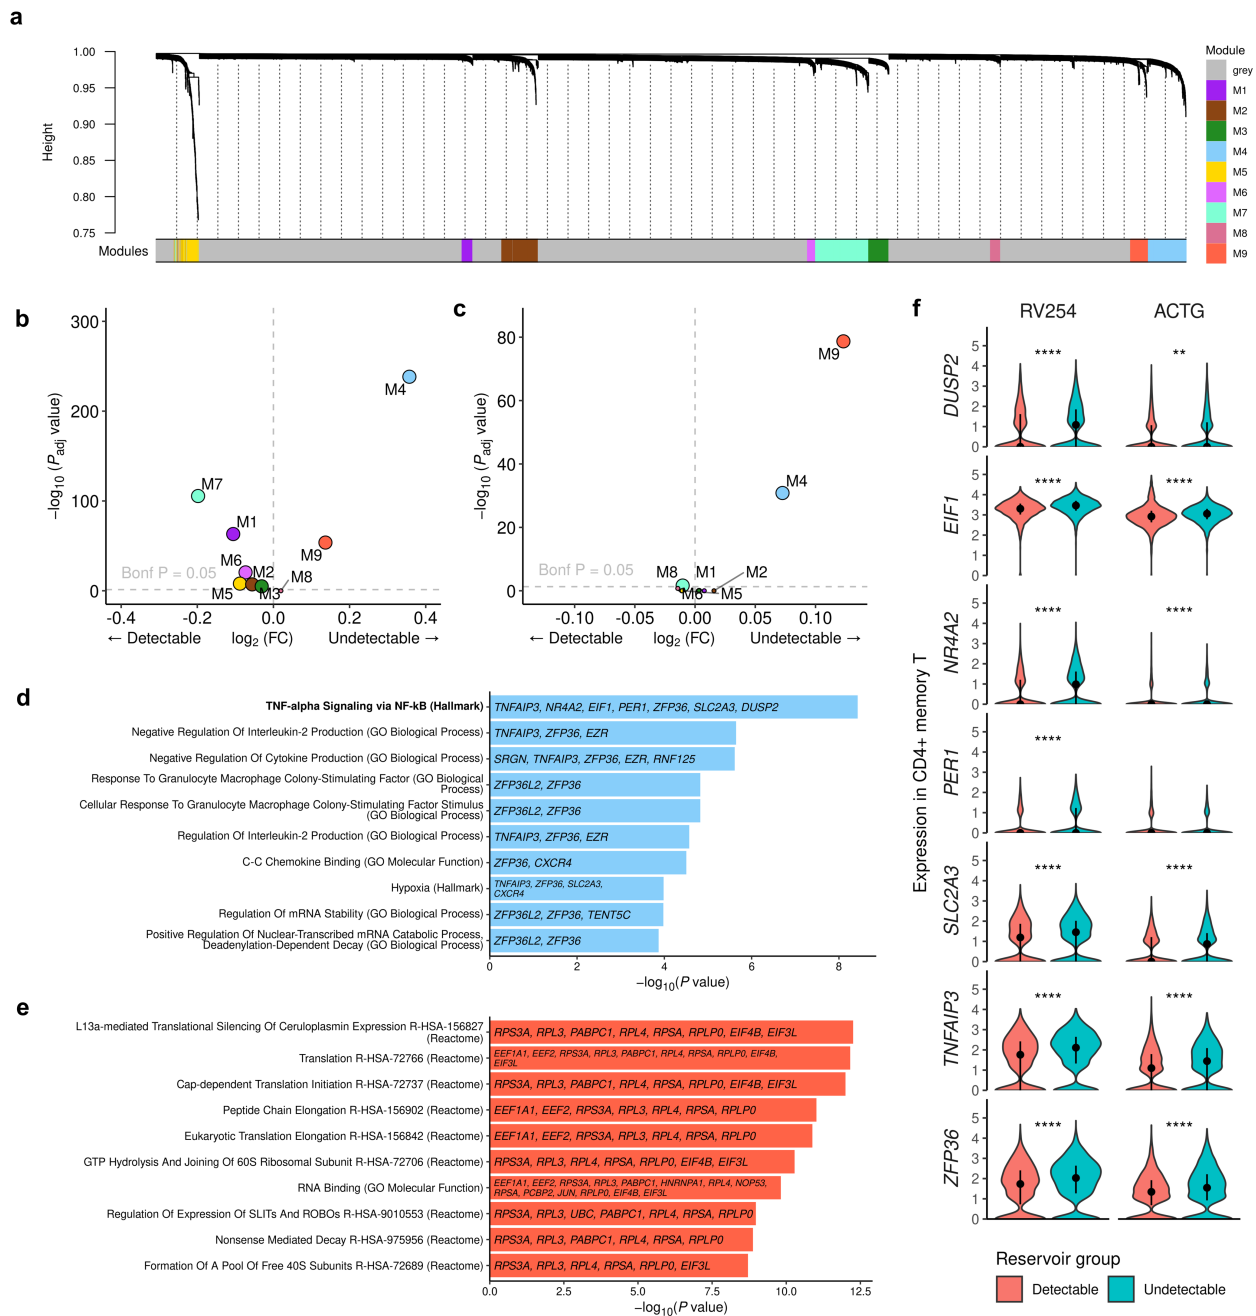

**Supplementary Figure 6. Pathway analyses identified distinct signatures associated with reservoir size.** **a** WGCNA dendrogram of modules of coexpressed genes in memory CD4<sup>+</sup> T cells from the RV254 Thai study. **b** The M4 and M9 WGCNA modules were enriched in cells from participants with undetectable reservoir (n=8) compared to detectable reservoir (n=6) based on the top 25 hub genes in the module. **c** Module hub genes found in RV254 were enriched in cells from the undetectable reservoir participants in the A5354 cohort when HIV DNA levels were grouped categorically (detectable=12, undetectable=11). Enrichment analysis of **d** M4 and **e** M9 hub genes and pathways significantly enriched (FDR < 0.05). Significance was determined using the EnrichR implementation of Fisher's exact test. *P* values were FDR corrected and the ten most significant genesets per module with adjusted *P* < 0.05 are shown. **f** Violin plots showing significant DEGs in CD4<sup>+</sup> memory T cells from the NF-κB pathway genes enriched in the M4 module from both studies. RV254, n=7,536 cells and ACTG, n= 8,331 cells. \*\* *P* < 0.01, \*\*\*\* *P* < 0.0001. For **b,c**, and **f**, significance was determined by the Mann-Whitney *U* two-sided test with Bonferroni correction.

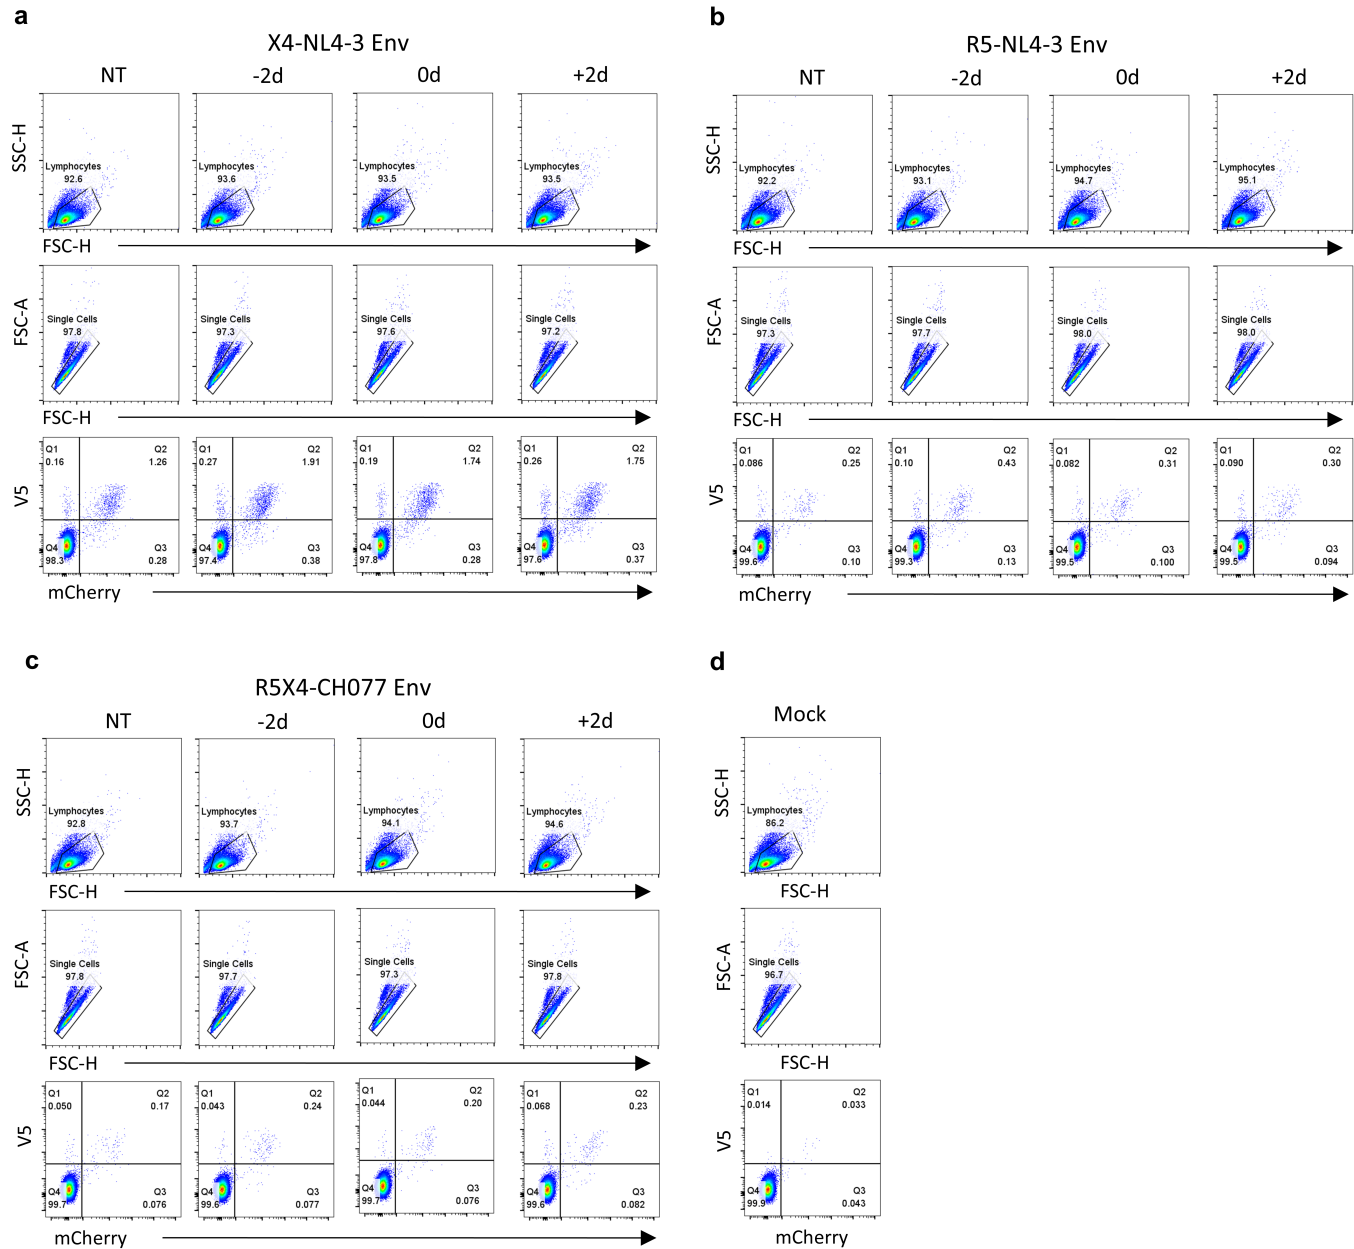

**Supplementary Figure 7. Gating strategy for the identification of latent and productive infections in vitro.** Latently (V5) and productively (mCherry, V5) infected PBMC with pMorpheus-V5 were pseudo-typed with **a** X4-NL4-3, **b** R5-NL4-3 or **c** R5X4-CH077 viral Env protein. PBMC isolated from healthy participants were cultured with PHA and IL-2 for 3 days, when they were infected with designated viruses. Cultures were treated with IL1B prior, simultaneously or after transduction. Cells were analyzed 3 days post transduction. **d** Mock transduced cells are shown for comparison. NT: no treatment control.

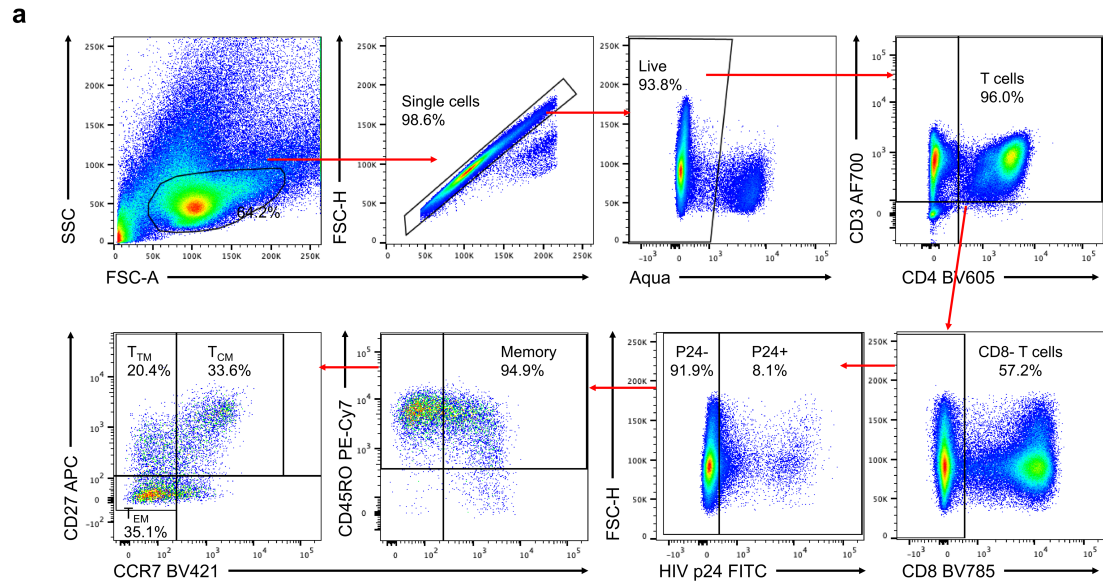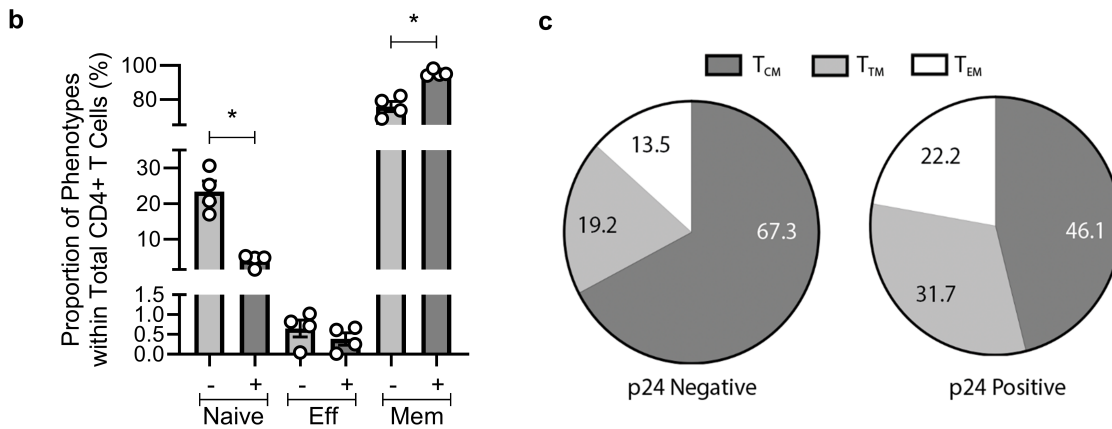

**Supplementary Figure 8. Effects of HIV infection on in vitro CD4+ T cell memory phenotypes. a** Gating strategy. **b** Bar plot depicts the mean percentages of CD45RO- CCR7- Naive (Naive), CD45RO- CCR7+ Effector (Eff), and CD45RO+ memory (Mem) CD4+ T cell populations in total CD4+ T cells infected or not with HIV, as determined by intracellular p24 staining. Significance was determined using the Mann-Whitney *U* two-sided test. *n*=4, \* *P* < 0.05. Bar height and error bars represent mean values  $\pm$  SEM. **c** Pie chart illustrates the mean percentages of memory subsets T<sub>CM</sub>, T<sub>TM</sub>, and T<sub>EM</sub> within total CD45RO+ memory CD4+ T cells. *n*=4 samples. Source data and exact *P* values are provided in the Source Data file.

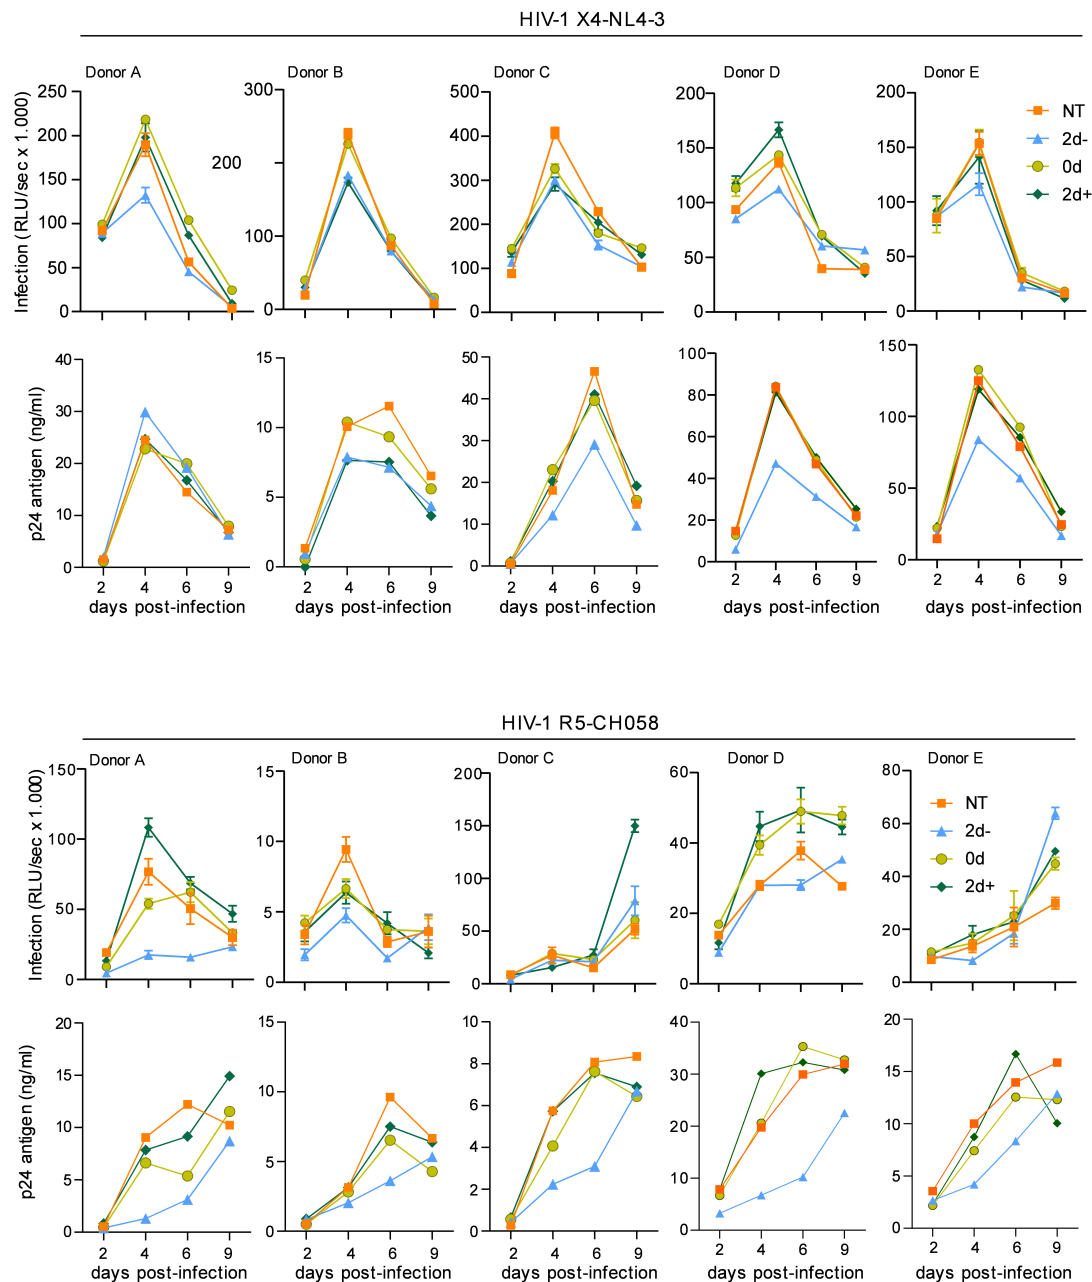

**Supplementary Figure 9. Effects of recombinant IL1B on HIV replication in PBMC cultures.** Time course plots of the infectious virus and p24 antigen yields of NL4-3 or CH058 (n=5). PBMC were isolated from buffy coats and incubated for 3 days, with PHA and IL-2, when they were infected with NL4-3 or CH058. IL1B (10 ng/ml) was added 2 days prior to infection (2d-), at the same time (0d), or 2 days post-infection (2d+). Supernatants were collected at designated time points and assessed for infectious virus and p24 antigen. Source data are provided in the Source Data file.



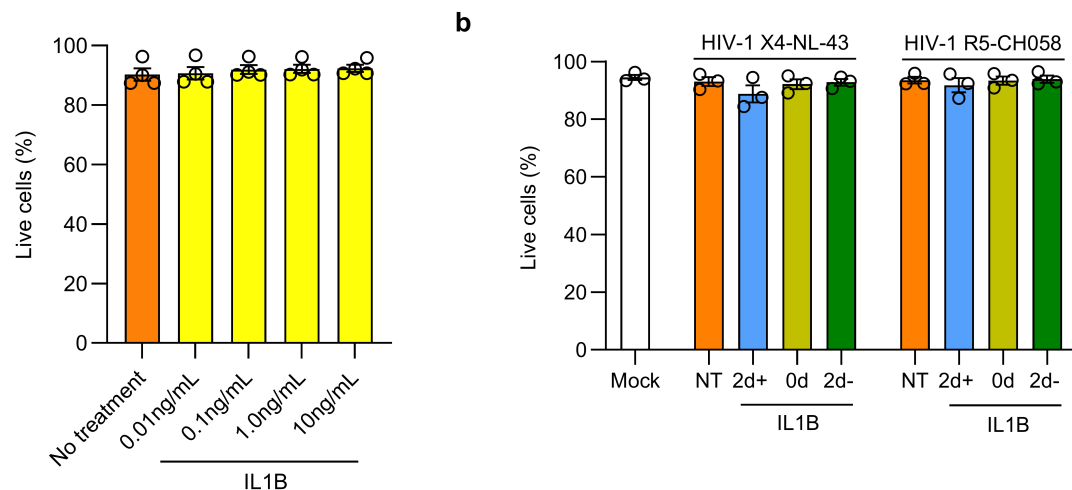

**Supplementary Figure 10. Effect of IL1B on cell viability.** Isolated PBMC were treated and infected as in **a** Figure 5d (orange: no treatment and yellow: treatment with IL1B; n=4) and **b** 5e-f and Supplementary Figure 9 (white: Mock, orange: no treatment, blue: treatment two days post-infection, yellow: treatment at the same time as infection, green: treatment 2 days prior to infection; n=3), respectively. On day 3 post-infection cells were harvested, stained with fixable viability dye and FACs analyzed for cell viability. Each dot represents a single participant. Bar height and error bars represent mean values  $\pm$  SEM. Source data are provided in the Source Data file.

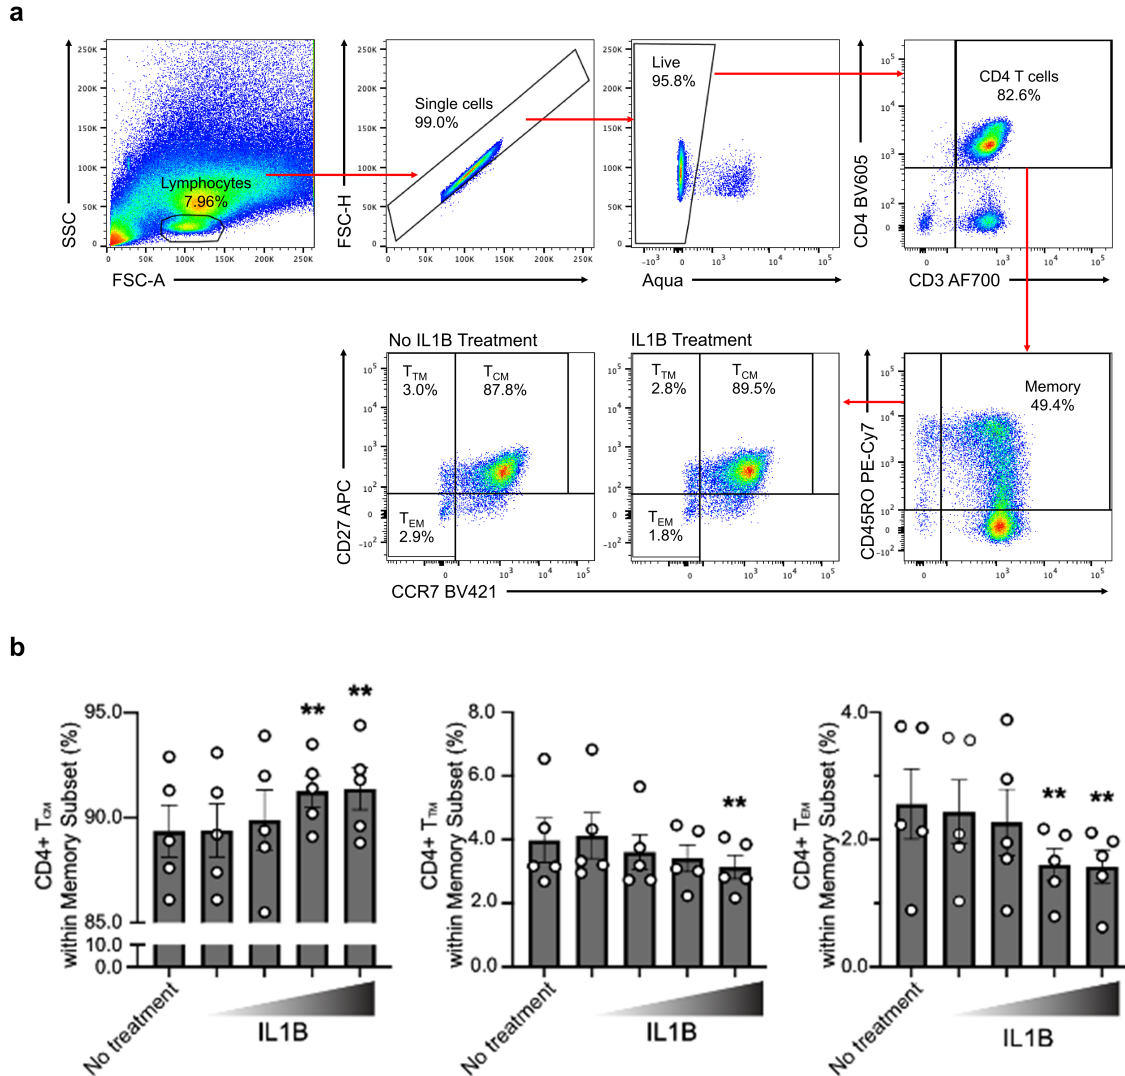

**Supplementary Figure 11. Effects of recombinant IL1B on in vitro CD4+ T cell memory phenotypes. a** Gating strategy. **b** Percentages of T<sub>CM</sub>, T<sub>TM</sub>, and T<sub>EM</sub> subsets within total memory CD4+ T cells were determined following dose-dependent IL1B treatment at different concentrations (0.01 ng/ml, 0.1 ng/ml, 1 ng/ml, 10 ng/ml). Statistical significance was assessed using the Mann-Whitney *U* two-sided test, based on treated samples relative to their respective untreated control. *n*=5. \*\* *P* < 0.01. Bar height and error bars represent mean values +/- SEM. Source data and exact *P* values are provided in the Source Data file.

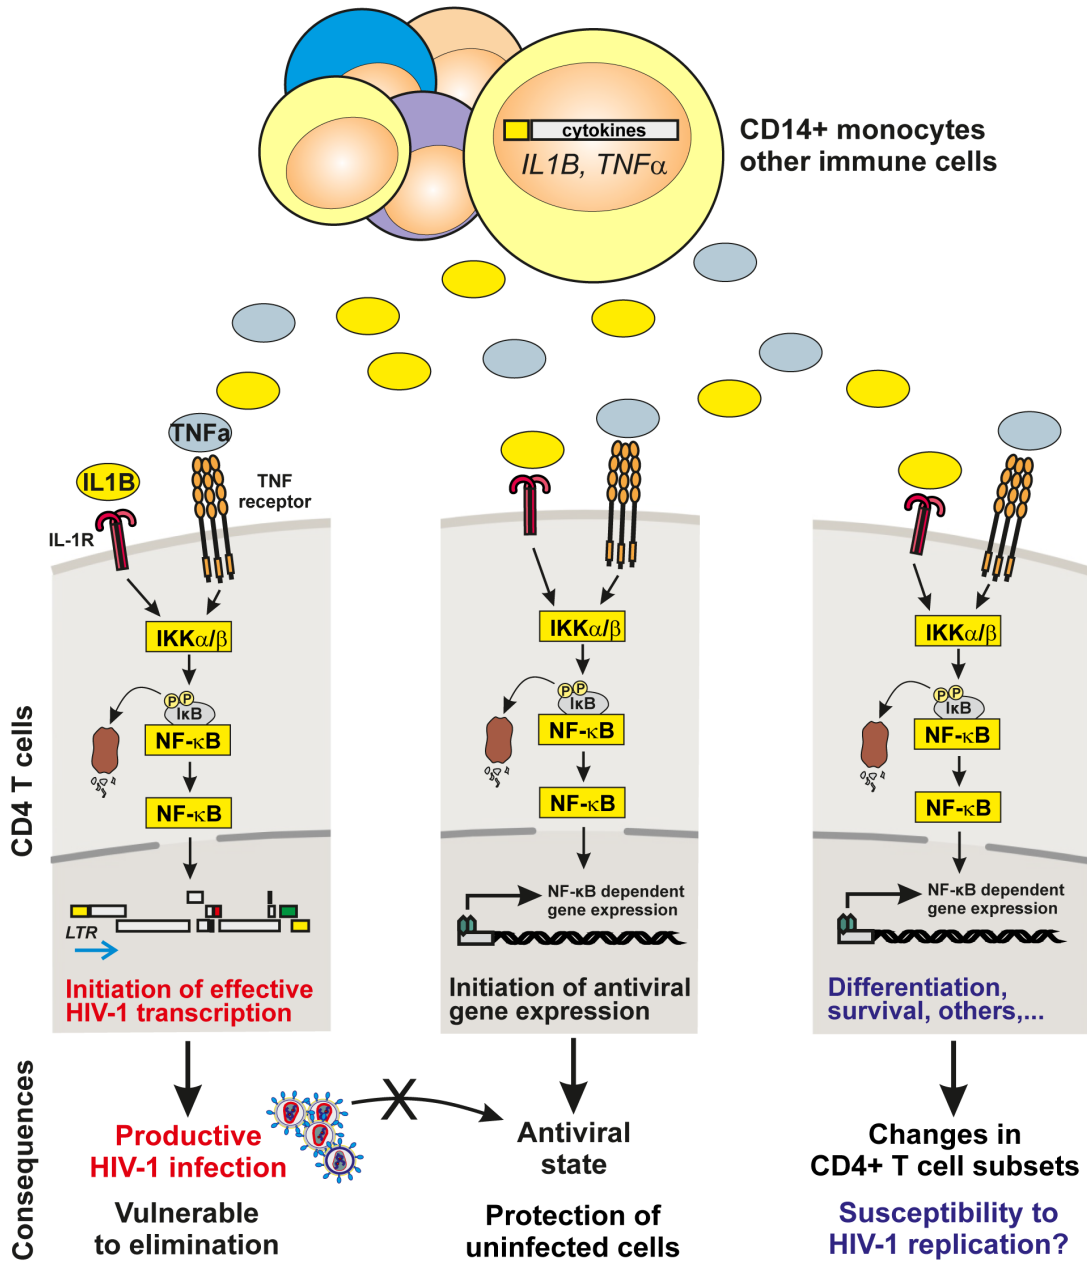

**Supplementary Figure 12. Working model of potential mechanisms for IL1B effects on reservoir size.** We hypothesize that IL1B may affect the latent HIV reservoir by 1) acting as a natural LRA, 2) contributing to reduced seeding of the reservoir, and 3) changing the composition of CD4+ T cell subsets.

**Supplementary table 1.** Different cell populations as detected in scRNA-seq analyses.

| Cell type                        | RV254      |           | ACTG A5354 |           |
|----------------------------------|------------|-----------|------------|-----------|
|                                  | Cell count | Frequency | Cell count | Frequency |
| Naive CD4+ T*                    | 8029       | 0.128     | 22289      | 0.159     |
| CD14+ monocyte**                 | 7853       | 0.125     | 17797      | 0.127     |
| Naive CD8+ T                     | 6860       | 0.109     | 12365      | 0.088     |
| CD8+ T <sub>EM</sub>             | 5553       | 0.088     | 16740      | 0.119     |
| NKT-like                         | 4753       | 0.076     | 11597      | 0.083     |
| CD4+ T <sub>CM</sub>             | 4315       | 0.069     | -          | -         |
| Memory CD4+ T                    | -          | -         | 13274      | 0.095     |
| Memory CD4+ T (+IFN)             | -          | -         | 361        | 0.003     |
| CD8+ T <sub>CM</sub>             | 3812       | 0.061     | 9546       | 0.068     |
| Memory B cell                    | 3583       | 0.057     | 7923       | 0.057     |
| CD4+ T <sub>EM</sub>             | 3221       | 0.051     | -          | -         |
| NK                               | 3207       | 0.051     | 6241       | 0.045     |
| Naive B cell                     | 2526       | 0.040     | 7301       | 0.052     |
| MAIT                             | 1975       | 0.031     | 2223       | 0.016     |
| V $\gamma$ 9/V $\delta$ 2 T cell | 1868       | 0.030     | 555        | 0.004     |
| Treg                             | 1347       | 0.021     | 2652       | 0.019     |
| CD16+ monocyte                   | 1172       | 0.019     | 4425       | 0.032     |
| Megakaryocyte/platelet           | 578        | 0.009     | 781        | 0.006     |
| mDC                              | 471        | 0.007     | 1524       | 0.011     |
| Proliferating T cell             | 358        | 0.006     | 607        | 0.004     |
| Plasmablast                      | 297        | 0.005     | 492        | 0.004     |
| CD56 <sup>bright</sup> NK        | 294        | 0.005     | 934        | 0.007     |
| $\gamma\delta$ T cell            | 288        | 0.005     | -          | -         |
| Mono-platelet doublet            | 286        | 0.005     | -          | -         |
| pDC                              | 228        | 0.004     | 352        | 0.003     |
| HSC                              | 51         | 0.001     | 193        | 0.001     |

\* Naive CD4+ T population in RV254 contained cells from two clusters: Naive CD4+ T, Naive CD4+ T +ifn

\*\* CD14+ monocyte population in RV254 contained cells from two clusters: CD14+ monocyte, CD14+ activated monocyte

**Supplementary table 2.** Differentially expressed genes in each cell subset (log fold change >|0.25|, Bonferroni  $P < 0.05$ ).

| Cell type            | Number of DEG* | Genes (Detectable reservoir)                                                                                                                                    | Genes (Undetectable reservoir)                                                                                                                                                                                                                                                                                                                                                                                                                                                   |
|----------------------|----------------|-----------------------------------------------------------------------------------------------------------------------------------------------------------------|----------------------------------------------------------------------------------------------------------------------------------------------------------------------------------------------------------------------------------------------------------------------------------------------------------------------------------------------------------------------------------------------------------------------------------------------------------------------------------|
| CD14+ monocyte       | 78             | <i>AC020656.1, BTG2, CCL3L1, CD52, CYBA, EGR2, EGR3, GIMAP7, HLA-DQB1, IER2, JUN, KLF2, MNDA, RGS2, RHOB, TUBA1A, TXNIP, ZFP36L2</i>                            | <i>AC245128.3, ACSL1, ANPEP, AREG, ARL4C, BCL2A1, BCL3, C15orf48, C5AR1, CCL4, CDKN1A, CXCL2, CXCL8, DUSP2, EREG, ETS2, FCAR, FTH1, G0S2, GPR183, GRASP, HIF1A, ICAM1, <b>IL1B</b>, MAFB, MAP3K8, MARCKSL1, NAMPT, NFE2L2, NFKBIA, NFKBIZ, NINJ1, NLRP3, PDE4B, PFKFB3, PHLDA1, PIM3, PLAUR, PLEK, PPIF, PPP1R15A, PRDM1, RAB20, REL, RETN, RNF144B, SAMSNI, SERPINB2, SLC25A37, SOD2, SRGN, THBD, <b>THBS1</b>, TIMP1, TIPARP, TMEM123, TMEM176A, TMEM176B, TNFAIP3, ZNF331</i> |
| CD8+ T <sub>CM</sub> | 51             | <i>CCL4, CCL4L2, CD2, CD8B, CMC1, CTSW, CYBA, CYTOR, DYNLL1, GIMAP4, GIMAP7, GZMA, GZMH, HLA-DPB1, HLA-DQA1, HLA-DQB1, LGALS1, NKG7, PLEK, PSMB9, TIGIT</i>     | <i>ARID5A, CREM, CSRNPI, EZR, FAM177A1, FOSL2, FTH1, GABARAPL1, GADD45B, MTFP1, NFKBIA, NR4A2, PDE4B, PDE4D, PER1, PIK3R1, PTP4A1, SATB1, SELENOK, SLC7A5, SRGN, SYTL3, TNFAIP3, TSPYL2, TUBA4A, USP36, YPEL5, ZFP36, ZFP36L2, ZNF331</i>                                                                                                                                                                                                                                        |
| CD8+ T <sub>EM</sub> | 46             | <i>ANXA1, CCL4L2, CD3D, CD3G, CD8B, CLIC3, CX3CR1, CYTOR, DYNLL1, EMP3, GIMAP4, GIMAP7, GZMB, LAIR2, LINC00861, M6PR, MT2A, PLEK, PRF1, PSMB9, STAT1, STK38</i> | <i>CREM, CXCR4, DNAJB1, DUSP2, FOSL2, GADD45B, GNLY, IL7R, KLRB1, KLRC3, MAP3K8, NR4A2, PER1, PIK3R1, RBM38, SLC7A5, SYTL3, TNFAIP3, TUBA4A, TYROBP, ZFP36, ZFP36L2, ZNF331, ZNF683</i>                                                                                                                                                                                                                                                                                          |
| CD16+ monocyte       | 38             | <i>CD52, CLEC12A, CX3CR1, DUSP6, DYNLL1, GIMAP7, HLA-DQA2, SMIM25, TNFSF10, TXNIP</i>                                                                           | <i>ADK, CCL3, CCL4, CD83, CXCL8, DUSP2, ETS2, G0S2, ICAM1, <b>IL1B</b>, NFKBIA, NINJ1, NLRP3, PDE4B, PFKFB3, PIM3, PLAUR, PLEK, PPP1R15A, REL, RETN, SAMSNI, SNHG15, TMEM176A, TMEM176B, TNF, TNFAIP3, ZFP36L1</i>                                                                                                                                                                                                                                                               |
| Vγ9/Vδ2 T cell       | 36             | <i>CCL3, CCL4L2, CX3CR1, CYTOR, DENND2D, GIMAP7, IL7R, KLF6, MYOM2, PLEK, TRAC, TXNIP</i>                                                                       | <i>ARID5A, CREM, CSRNPI, CXCR4, DUSP2, FOSL2, FTH1, GABARAPL1, GADD45B, IFNGR1, LDHA, MAP3K8, METRNL, NFE2L2, NR4A2, PDE4B, PER1, PIK3R1, SELENOK, SLC7A5, SRSF7, TNFAIP3, TUBA4A, ZNF331</i>                                                                                                                                                                                                                                                                                    |
| mDC                  | 33             | <i>DYNLL1, S100A11, TXNIP</i>                                                                                                                                   | <i>ATP1B3, CDKN1A, CREM, CSRNPI, CXCL16, DUSP2, DUSP4, FTH1, GPR183, HERPUD1, INSIG1, JARID2, MAP3K8, NAMPT, NFE2L2, NR4A2, NR4A3, PFKFB3, PLAUR, RASSF5, REL, RILPL2, SAMSNI, SLC2A3, SNX9, SRGN, STX11, <b>THBS1</b>, TIPARP, ZNF331</i>                                                                                                                                                                                                                                       |
| NK                   | 32             | <i>CX3CR1, DENND2D, DYNLL1, GIMAP7, LAIR2, LINC00861, PSMB9, S100A11, UCP2, ZNF600</i>                                                                          | <i>AREG, CCL4, CCL4L2, CD3E, COL6A2, CREM, CSNK1D, CSRNPI, CXCR4, DIP2A, DUSP2, GABARAPL1, GADD45B, IFNGR1, MAP3K8, NFKBIA, NR4A2, PER1, PIK3R1, S100B, ZFP36L2, ZNF331</i>                                                                                                                                                                                                                                                                                                      |
| MAIT                 | 28             | <i>CCL4, CTSW, GBP5, GIMAP4, GIMAP7, KLRF1, STAT1</i>                                                                                                           | <i>BHLHE40, CREM, CXCR4, DNAJB1, FTH1, GTF3C1, HIST1H1C, LITAF, MAP3K8, NR4A2, PDE4B, PDE4D, PER1, PIK3R1, RNF125, SLC7A5, SRGN, SRSF7, SYTL3, TNFAIP3, ZNF331</i>                                                                                                                                                                                                                                                                                                               |
| NKT-like             | 25             | <i>CD3D, CD3G, CD8A, CD8B, CX3CR1, CYTOR, DYNLL1, IKZF2, LAIR2, TRAC, TRGC2</i>                                                                                 | <i>ALOX5AP, CMC1, COL6A2, FGFBP2, HLA-DRB1, KIR3DL1, KLRB1, MGAT4A, NFKBIA, PRMT2, PTGDS, SYNGR1, TXK, TYROBP</i>                                                                                                                                                                                                                                                                                                                                                                |
| CD4+ T <sub>CM</sub> | 23             | <i>GIMAP4, GIMAP7, S100A11</i>                                                                                                                                  | <i>ARID5A, CHD1, CREM, DNAJB1, EZR, FTH1, H3F3B, NR3C1, NR4A2, PER1, PIK3IP1, PIK3R1, SARAF, SESN3, SRGN, TENT5C, YPEL5, ZFP36, ZFP36L2, ZNF331</i>                                                                                                                                                                                                                                                                                                                              |
| Memory B cell        | 17             | <i>HLA-DQA2</i>                                                                                                                                                 | <i>ARID5A, CD55, CD83, CXCR4, EZR, GRASP, HERPUD1, HIF1A, LY9, MAPK11P1L, NFKBIA, NFKBID, NR4A1, PELI1, SNX9, ZNF331</i>                                                                                                                                                                                                                                                                                                                                                         |
| Naive B cell         | 14             | <i>CD79B, CPNE5, CYBA, FCRL3, HLA-DQA2, PSMB9, SCIMP</i>                                                                                                        | <i>EZR, HLA-DQA1, NFKBIA, PELI1, PIK3IP1, SESN1, SNX9</i>                                                                                                                                                                                                                                                                                                                                                                                                                        |
| CD4+ T <sub>EM</sub> | 14             | <i>GIMAP7, S100A11</i>                                                                                                                                          | <i>ARID5A, CREM, FTH1, LITAF, NR4A2, PDE4D, PER1, PIK3R1, RNF125, SRGN, ZFP36L2, ZNF331</i>                                                                                                                                                                                                                                                                                                                                                                                      |

|                           |   |                              |                                                                     |
|---------------------------|---|------------------------------|---------------------------------------------------------------------|
| Naive CD4+ T              | 9 | <i>CYBA</i>                  | <i>ARID5A, DNAJB1, PIK3IP1, SARAF, SOCS3, TOB1, ZFP36L2, ZNF331</i> |
| Treg                      | 7 | <i>DYNLL1, S100A11</i>       | <i>PELI1, PIK3IP1, PIK3R1, SARAF, SBDS</i>                          |
| Naive CD8+ T              | 6 | <i>CYBA, LINC01871</i>       | <i>ARID5A, DCXR, FTH1, ZNF331</i>                                   |
| pDC                       | 3 | <i>CYBA, HLA-A, HLA-DQB1</i> |                                                                     |
| CD56 <sup>bright</sup> NK | 3 |                              | <i>FTL, H3F3B, LITAF</i>                                            |
| Plasmablast               | 1 | <i>GSTM1</i>                 |                                                                     |
| γδ T cell                 | 1 |                              | <i>FTH1</i>                                                         |
| Megakaryocyte/platelet    | 0 |                              |                                                                     |
| Proliferating T cell      | 0 |                              |                                                                     |

---

\* Top two significant DEG are highlighted in red, \*not including genes that are blacklisted or expressed in less than 10% of cells in both groups

**Supplementary table 3.** Top 20 enriched pathways and processes.

| Term          | Description                                              | Log(p-value) | Log(q-value) | InTerm_<br>InList | Genes*                                                                                                                                                                                                                                                                                                       |
|---------------|----------------------------------------------------------|--------------|--------------|-------------------|--------------------------------------------------------------------------------------------------------------------------------------------------------------------------------------------------------------------------------------------------------------------------------------------------------------|
| GO:0046649    | lymphocyte activation                                    | -20.9        | -16.6        | 42/748            | <i>ANXA1, BCL3, PRDM1, ZFP36L1, ZFP36L2, CD2, CD3D, CD3E, CD3G, CD8A, CD8B, CD79B, CDKN1A, KLF6, MAP3K8, CD55, GPR183, EGR3, HLA-A, HLA-DPB1, ICAM1, IL1B, IL7R, LGALS1, LY9, MND, PIK3R1, PRF1, SATB1, TNFAIP3, TYROBP, CD83, MAFB, PELI1, SELENOK, SAMSNI, NFKBIZ, NFKBID, NLRP3, FCRL3, TIGIT, ZNF683</i> |
| GO:0001817    | regulation of cytokine production                        | -19.9        | -15.9        | 41/755            | <i>ANXA1, BCL3, CSAR1, CD2, CD3E, CX3CR1, CYBA, EREG, HIF1A, HLA-A, HLA-DPB1, IFNGR1, IL1B, LY9, MND, PDE4B, PDE4D, PER1, PIK3R1, SRGN, REL, CCL3, STAT1, THBS1, TNF, TNFAIP3, TXK, TYROBP, EZR, ZFP36, NR4A3, CD83, LITAF, KLF2, RNF125, PELI1, SELENOK, NLRP3, GBP5, TIGIT, SCIMP</i>                      |
| GO:0019221    | cytokine-mediated signaling pathway                      | -14.9        | -11.8        | 36/796            | <i>ANXA1, CDKN1A, MAP3K8, CX3CR1, EREG, ACSL1, CXCL2, HIF1A, HLA-A, HLA-DPB1, HLA-DQA1, HLA-DQA2, HLA-DQB1, HLA-DRB1, ICAM1, IFNGR1, IL1B, IL7R, CXCL8, MT2A, NFKBIA, SERPINB2, PIK3R1, PSMB9, CCL3, CCL3L1, CCL4, SOD2, STAT1, TIMP1, TNF, TNFAIP3, TXK, CXCR4, SOCS3, PELI1</i>                            |
| GO:0002366    | leukocyte activation involved in immune response         | -10.9        | -8.2         | 29/711            | <i>ANPEP, ANXA1, BCL3, CSAR1, CYBA, CD55, GPR183, FCAR, FTH1, FTL, ICAM1, LGALS1, LY9, MND, PLAUR, S100A11, CCL3, SLC2A3, TYROBP, NR4A3, DYNLL1, SYNGR1, YPEL5, RETN, NFKBIZ, NFKBID, NLRP3, CLEC12A, ZNF683</i>                                                                                             |
| GO:1902532    | negative regulation of intracellular signal transduction | -12.5        | -9.6         | 28/571            | <i>BCL3, DUSP2, DUSP4, DUSP6, HIF1A, IL1B, NFE2L2, PDE4D, PER1, PLAUR, PLEK, RGS2, SOD2, STAT1, THBS1, TNFAIP3, EZR, SOCS3, LITAF, HERPUD1, PPIF, STK38, SESN1, RNF125, NFKBID, PIK3IP1, NLRP3, SESN3</i>                                                                                                    |
| GO:0043068    | positive regulation of programmed cell death             | -9.8         | -7.3         | 27/688            | <i>ANXA1, RHOB, CDKN1A, DUSP6, GZMA, GZMB, PRMT2, JUN, LDHA, MND, GADD45B, PLAUR, S100B, CCL3, SOD2, THBS1, TNF, TYROBP, NR4A3, TNFSF10, PPIF, TXNIP, PHLDA1, G0S2, NFKBID, NLRP3, SCIMP</i>                                                                                                                 |
| GO:0097190    | apoptotic signaling pathway                              | -11.1        | -8.3         | 27/607            | <i>BCL2A1, BCL3, CD3E, CDKN1A, CX3CR1, GZMH, GZMB, HIF1A, ICAM1, IL1B, JUN, NFE2L2, NR4A2, PIK3R1, PLAUR, SRGN, SOD2, THBS1, TNF, TNFAIP3, TYROBP, TNFSF10, HERPUD1, PPIF, PPP1R15A, G0S2, SELENOK</i>                                                                                                       |
| GO:0071396    | cellular response to lipid                               | -10.9        | -8.2         | 27/616            | <i>ANXA1, ZFP36L1, ZFP36L2, CX3CR1, CD55, NR3C1, CXCL2, NR4A1, PRMT2, ICAM1, IL1B, CXCL8, INSIG1, NFKBIA, NR4A2, PDE4B, PDE4D, PER1, CCL3, TNF, TNFAIP3, ZFP36, NR4A3, LITAF, TRAC, NLRP3, SCIMP</i>                                                                                                         |
| GO:1901652    | response to peptide                                      | -10.0        | -7.4         | 24/534            | <i>ANXA1, AREG, ZFP36L1, CYBA, EGR2, EREG, NR4A1, ICAM1, IL1B, NFE2L2, NFKBIA, NR4A2, PIK3R1, STAT1, TIMP1, TNFAIP3, BTG2, NR4A3, TNFSF10, SOCS3, NAMPT, KLF2, RETN, SESN3</i>                                                                                                                               |
| GO:0050900    | leukocyte migration                                      | -10.5        | -7.8         | 24/504            | <i>ANXA1, ATP1B3, CSAR1, CD2, CX3CR1, GPR183, CXCL2, ICAM1, IL1B, CXCL8, PDE4B, PDE4D, PIK3R1, CCL3, CCL3L1, CCL4, THBD, THBS1, TNF, CXCR4, SLC7A5, SBDS, CXCL16, SELENOK</i>                                                                                                                                |
| GO:0002683    | negative regulation of immune system process             | -10.9        | -8.2         | 24/483            | <i>ANXA1, ZFP36L1, CD55, IL7R, MND, NFE2L2, NFKBIA, PIK3R1, CCL3, THBS1, TNF, TNFAIP3, TYROBP, EZR, ZFP36, MAFB, TMEM176B, RNF125, TMEM176A, PELI1, SAMSNI, NFKBID, FCRL3, TIGIT</i>                                                                                                                         |
| GO:0009636    | response to toxic substance                              | -10.0        | -7.4         | 24/533            | <i>ALOX5AP, ANXA1, AREG, RHOB, CDKN1A, GSTM1, ICAM1, JUN, LDHA, MT2A, NFE2L2, NR4A2, RGS2, CCL3, CCL4, SOD2, STAT1, TNF, TNFAIP3, NR4A3, PPIF, KLF2, TXNIP, SESN1</i>                                                                                                                                        |
| GO:0032496    | response to lipopolysaccharide                           | -10.5        | -7.8         | 20/338            | <i>CSAR1, CX3CR1, CD55, CXCL2, ICAM1, IL1B, CXCL8, JUN, NFKBIA, PDE4B, PDE4D, CCL3, THBD, TNF, TNFAIP3, ZFP36, LITAF, PELI1, NLRP3, SCIMP</i>                                                                                                                                                                |
| hsa04640      | Hematopoietic cell lineage                               | -15.4        | -12.1        | 16/97             | <i>ANPEP, CD2, CD3D, CD3E, CD3G, CD8A, CD8B, CD55, HLA-DPB1, HLA-DQA1, HLA-DQA2, HLA-DQB1, HLA-DRB1, IL1B, IL7R, TNF</i>                                                                                                                                                                                     |
| M54           | PID IL12 2PATHWAY                                        | -15.4        | -12.1        | 14/63             | <i>CD3D, CD3E, CD3G, CD8A, CD8B, GZMA, GZMB, HLA-A, HLA-DRB1, IL1B, GADD45B, CCL3, CCL4, STAT1</i>                                                                                                                                                                                                           |
| hsa05142      | Chagas disease (American trypanosomiasis)                | -9.9         | -7.4         | 12/102            | <i>CD3D, CD3E, CD3G, IFNGR1, IL1B, CXCL8, JUN, NFKBIA, PIK3R1, CCL3, CCL3L1, TNF</i>                                                                                                                                                                                                                         |
| GO:0071216    | cellular response to biotic stimulus                     | -13.2        | -8.8         | 11/249            | <i>CX3CR1, ICAM1, IL1B, CXCL8, NFKBIA, PDE4B, CCL3, TNF, TNFAIP3, TXNIP, NLRP3</i>                                                                                                                                                                                                                           |
| GO:0002757    | immune response-activating signal transduction           | -12.8        | -8.8         | 10/647            | <i>CD79B, CYBA, HLA-DQA1, HLA-DQA2, NFKBIA, PSMB9, EZR, PELI1, FCRL3, SCIMP</i>                                                                                                                                                                                                                              |
| GO:0033077    | T cell differentiation in thymus                         | -9.0         | -6.7         | 10/72             | <i>ZFP36L1, ZFP36L2, CD3D, CD3E, CD3G, EGR3, IL1B, IL7R, MAFB, NFKBID</i>                                                                                                                                                                                                                                    |
| R-HSA-6783783 | Interleukin-10 signaling                                 | -10.1        | -6.8         | 6/47              | <i>ICAM1, IL1B, CXCL8, CCL3, CCL4, TNF</i>                                                                                                                                                                                                                                                                   |

\*Genes from the input DEG lists that are present in the given enriched pathway/process are colored as follows: Teal - upregulated in the undetectable group in all cell subsets in which it is a DEG; red - upregulated in the detectable group; black - upregulated in both groups in different cell subsets



**Supplementary table 4.** Enriched pathways for each reservoir phenotype stratified by cell subset ( $NES \geq |1.4|$ ,  $P < 0.001$ ).

| Cell type            | Enrichment in phenotype | Geneset                                                              | Size | NES  |
|----------------------|-------------------------|----------------------------------------------------------------------|------|------|
| CD14+ monocyte       | undetectable            | R-HSA-6783783: Interleukin-10 signaling                              | 43   | 2.3  |
| CD16+ monocyte       | undetectable            | R-HSA-6783783: Interleukin-10 signaling                              | 43   | 2.0  |
| CD14+ monocyte       | undetectable            | GO:0032496: response to lipopolysaccharide                           | 260  | 1.9  |
| CD14+ monocyte       | undetectable            | GO:0071216: cellular response to biotic stimulus                     | 198  | 1.8  |
| pDC                  | undetectable            | GO:0050900: leukocyte migration                                      | 414  | 1.6  |
| mDC                  | undetectable            | GO:0032496: response to lipopolysaccharide                           | 260  | 1.5  |
| CD14+ monocyte       | undetectable            | GO:0050900: leukocyte migration                                      | 414  | 1.5  |
| CD16+ monocyte       | undetectable            | GO:0002683: negative regulation of immune system process             | 387  | 1.5  |
| NK                   | undetectable            | GO:1902532: negative regulation of intracellular signal transduction | 433  | 1.5  |
| CD4+ T <sub>EM</sub> | undetectable            | GO:1902532: negative regulation of intracellular signal transduction | 433  | 1.4  |
| CD4+ T <sub>CM</sub> | undetectable            | GO:0071396: cellular response to lipid                               | 478  | 1.4  |
| MAIT                 | undetectable            | GO:0002683: negative regulation of immune system process             | 387  | 1.4  |
| MAIT                 | undetectable            | GO:1902532: negative regulation of intracellular signal transduction | 433  | 1.4  |
| CD14+ monocyte       | undetectable            | GO:0019221: cytokine-mediated signaling pathway                      | 668  | 1.4  |
| CD14+ monocyte       | undetectable            | GO:0071396: cellular response to lipid                               | 478  | 1.4  |
| CD16+ monocyte       | undetectable            | GO:0001817: regulation of cytokine production                        | 618  | 1.4  |
| CD16+ monocyte       | undetectable            | GO:0032496: response to lipopolysaccharide                           | 260  | 1.4  |
| Naive CD4+ T         | detectable              | GO:0046649: lymphocyte activation                                    | 645  | -1.4 |
| Naive CD4+ T         | detectable              | GO:0002757: immune response-activating signal transduction           | 444  | -1.4 |

**Supplementary table 5.** Associations of increased *THBS1*/*IL1B* expression with cell subset population frequencies obtained by flow cytometry, and their effects on reservoir size.

| Phenotypic frequency           | Gene         | Beta    | Unadjusted <i>P</i> | Notes                    |
|--------------------------------|--------------|---------|---------------------|--------------------------|
| CD4+ CCR7+ CD45RO+ HLA-DR-     | <i>IL1B</i>  | -82.53  | 0.003               | central memory           |
| CD4+ CCR7+ CD45RO- PD-1+       | <i>IL1B</i>  | -223.9  | 0.003               | exhausted naïve          |
| Ki67+ (% of CD56 dim NK cells) | <i>THBS1</i> | -44.19  | 0.01                |                          |
| CD163+ classical               | <i>IL1B</i>  | -22.06  | 0.01                | classical monocytes      |
| CD4+ CCR7+ CD45RO+ HLA-DR-     | <i>THBS1</i> | -30.52  | 0.01                | central memory           |
| CD4+ CCR7+ CD45RO+ PD-1+       | <i>IL1B</i>  | -318.65 | 0.01                | exhausted central memory |
| CD4+ CCR7+ CD45RO+ PD-1-       | <i>THBS1</i> | -33.07  | 0.01                | central memory           |
| CD25+ (% of CD4)               | <i>IL1B</i>  | -12.34  | 0.01                |                          |
| Resting memory (% of B cells)  | <i>IL1B</i>  | -8.73   | 0.02                |                          |
| CD4+ CCR7+ CD45RO+ PD-1-       | <i>IL1B</i>  | -75.24  | 0.02                | central memory           |
| CD39+ CCR5+ (% of CD8)         | <i>IL1B</i>  | -129.5  | 0.02                |                          |
| CD39+ (% of CD4)               | <i>IL1B</i>  | -16.37  | 0.02                |                          |
| CD69+ (% of CD4)               | <i>IL1B</i>  | -356.67 | 0.03                |                          |
| Classical monocytes            | <i>IL1B</i>  | -26.76  | 0.04                |                          |
| CD38+ (% of CD56 dim NK cells) | <i>IL1B</i>  | -4.83   | 0.04                |                          |
| CD36+ classical                | <i>IL1B</i>  | -28.95  | 0.04                | classical monocytes      |
| CD4+ CD25+ CD127- HLA-DR+      | <i>IL1B</i>  | -90.96  | 0.04                | activated Tregs          |
| Ki67+ (% of CD4)               | <i>IL1B</i>  | -125.16 | 0.04                |                          |
| CD27+ (% of B cells)           | <i>IL1B</i>  | -8.06   | 0.04                |                          |
| CD13+ classical                | <i>IL1B</i>  | -26.8   | 0.05                | classical monocytes      |

Overlapping associations between *THBS1* and *IL1B* are shown in red.
